# Supplementary material for: Facile synthesis of a ZnO–BiOI p–n nano-heterojunction with excellent visible-light photocatalytic activity
Source: publisher site journal article supplement (doi:10.3762/bjnano.9.72), 2018-03-05
Supplement: Additional file 1 [file 2190-4286-9-72-S1.pdf]

# Supporting Information

for

## **Facile synthesis of a ZnO–BiOI p–n nano-heterojunction with excellent visible-light photocatalytic activity**

Mengyuan Zhang<sup>1</sup>, Jiaqian Qin<sup>2,3\*</sup>, Pengfei Yu<sup>1</sup>, Bing Zhang<sup>1</sup>, Mingzhen Ma<sup>1</sup>, Xinyu Zhang<sup>1,\*</sup>, and Riping Liu<sup>1</sup>

Address: <sup>1</sup>State Key Laboratory of Metastable Materials Science and Technology, Yanshan University, Qinhuangdao 066004, P. R. China,

<sup>2</sup>Metallurgy and Materials Science Research Institute, Chulalongkorn

University, Bangkok 10330, Thailand, and <sup>3</sup>Research Unit of Advanced

Materials for Energy Storage, Chulalongkorn University, Bangkok, Thailand

Email: Jiaqian Qin - [jiaqian.q@chula.ac.th](mailto:jiaqian.q@chula.ac.th); Xinyu Zhang -

[xyzhang@ysu.edu.cn](mailto:xyzhang@ysu.edu.cn)

\*Corresponding Author

## **Additional experimental information**

**Table S1:** Comparison of ZnO/TiO<sub>2</sub>-BiOI composites prepared by different methods

| <b>Samples</b>                                        | <b>Synthetic method</b>                                                                    | <b>Testing method</b>                                                                                    | <b>Test result</b>                                     | <b>Ref.</b> |
|-------------------------------------------------------|--------------------------------------------------------------------------------------------|----------------------------------------------------------------------------------------------------------|--------------------------------------------------------|-------------|
| <b>ZnO-BiOI nanoheterojunction</b>                    | Solution method followed by calcination.                                                   | Photocatalytic degradation of RhB solution under 300 W Xe lamp with a 420 nm cutoff filter.              | 99.3% of RhB was degraded after 100 min irradiation.   | This report |
| <b>TiO<sub>2</sub>-BiOI heterostructure</b>           | Soft chemical method                                                                       | Photocatalytic degradation of MO solution under 500 W halogen-tungsten lamp with a 420 nm cutoff filter. | 95% of MO was degraded after 2h irradiation.           | [1]         |
| <b>ZnO-BiOI heterostructure</b>                       | Chemical bath method                                                                       | Photocatalytic degradation of MO solution under 500W halogen-tungsten lamp with a 420 nm cutoff filter.  | 78% of MO was degraded after 4h irradiation.           | [2]         |
| <b>BiOBr-BiOI/ZnO nanowires heterostructure</b>       | Spine-coating                                                                              | Photocurrent under the 300 W Xe lamp with a 420 nm filter.                                               | 4.8 mA/cm <sup>2</sup>                                 | [3]         |
| <b>BiOI nanoplate- ZnO nanorod p-n heterojunction</b> | Electrodeposition followed by solvolthermal process                                        | Photoelectrocatalytic degradation of CR under 300 W Xe lamp with a 420 nm filter.                        | 93.66% of CR was degraded after 2 h irradiation.       | [4]         |
| <b>ZnO embedded into BiOI hybrid nanoflakes</b>       | Solvolthermal method followed by precipitation-deposition in combination with calcination. | Photodegradation of RhB under the irradiation of 300 W Xe lamp with a 420 nm filter.                     | 37.2% of the RhB was degraded after 5 min irradiation. | [5]         |
| <b>BiOI loaded ZnO nanorods composites</b>            | Solvolthermal method followed by precipitation-deposition                                  | Photodegradation of phenol under the irradiation of 500 W Xe lamp without filter.                        | 99.9% of phenol was degraded after 2 h irradiation.    | [6]         |

**Table S2:** The average crystal size estimated by Scherrer formula and the specific surface area of selected samples.

| Samples | Crystal size(nm) | Specific surface area (cm <sup>2</sup> /g) |
|---------|------------------|--------------------------------------------|
| B-1     | -                | 5.23                                       |
| B-2     | 31.25            | -                                          |
| B-3     | 14.8165          | -                                          |
| B-4     | 14.2949          | 20.83                                      |
| B-5     | 12.5145          | -                                          |
| B-6     | -                | 16                                         |

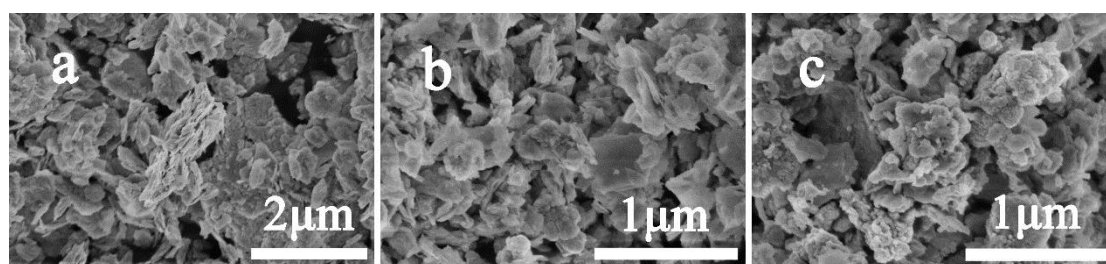

**Figure S1:** SEM image of a. B-2 (Bi/Zn=1/1), b. B-3 (Bi/Zn=1:2) and c. B-5 (Bi/Zn=1/4). From figure S1 a and b, it is obviously seen that the thickness and size of the particles from B-2 and B-3 samples diminish with the increase of the concentration of ZnO. When the Bi/Zn molar ratio reaches to 1/4, the assembled ZnO nano particles displace of the plate-like BiOI as the major shape of the B-5 sample.

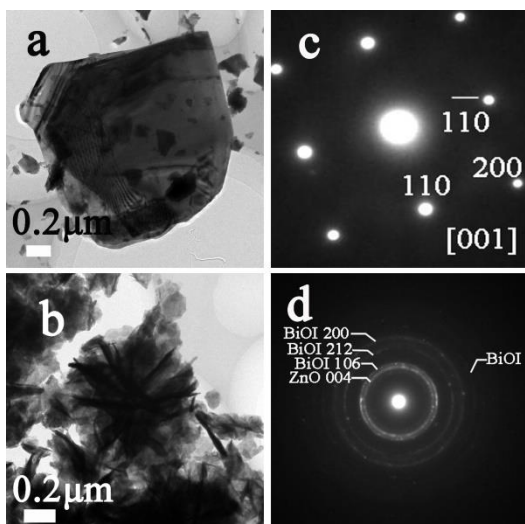

**Figure S2:** The TEM images: a. pure BiOI, b. B-3 sample and their SAED patterns: c. pure BiOI, d. B-3 sample. The morphology of the samples highly agree with the results of the SEM images. The crystallinity natures of B-1 and B-3 are each revealed by figure S2 c and d, which represent single and poly crystal feature respectively.

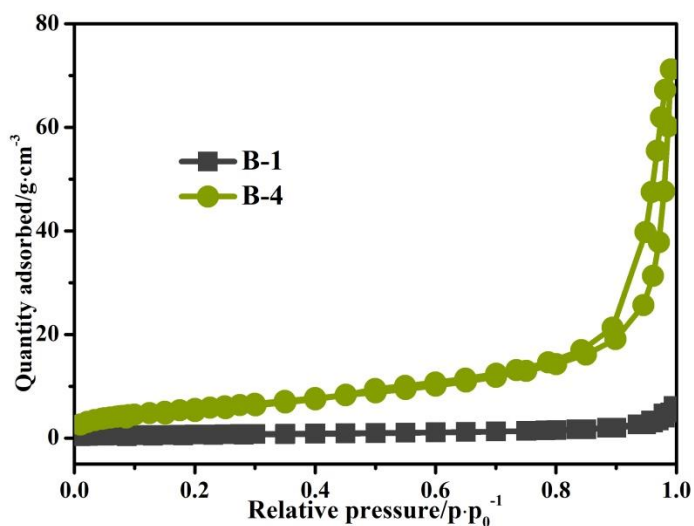

**Figure S3:** N<sub>2</sub> adsorption-desorption isotherms of pure BiOI and B-4 sample with Bi/Zn molar ratio=1/3. The B-4's shape corresponds to a type IV isotherm, with a loop shape of H3, demonstrating the pores in B-4 are mainly made up of slit-like cracks.

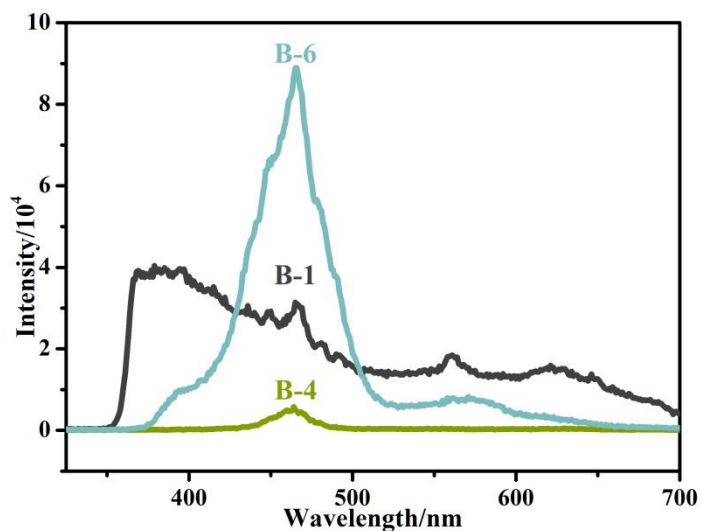

**Figure S4:** Photoluminescence spectra of B-1, B-4 and B-6 samples. The PL spectrum of B-4 has the lowest intensity comparing with the pure BiOI (B-1) and ZnO(B-6), illustrating the highest photo-induced charge separation efficiency.

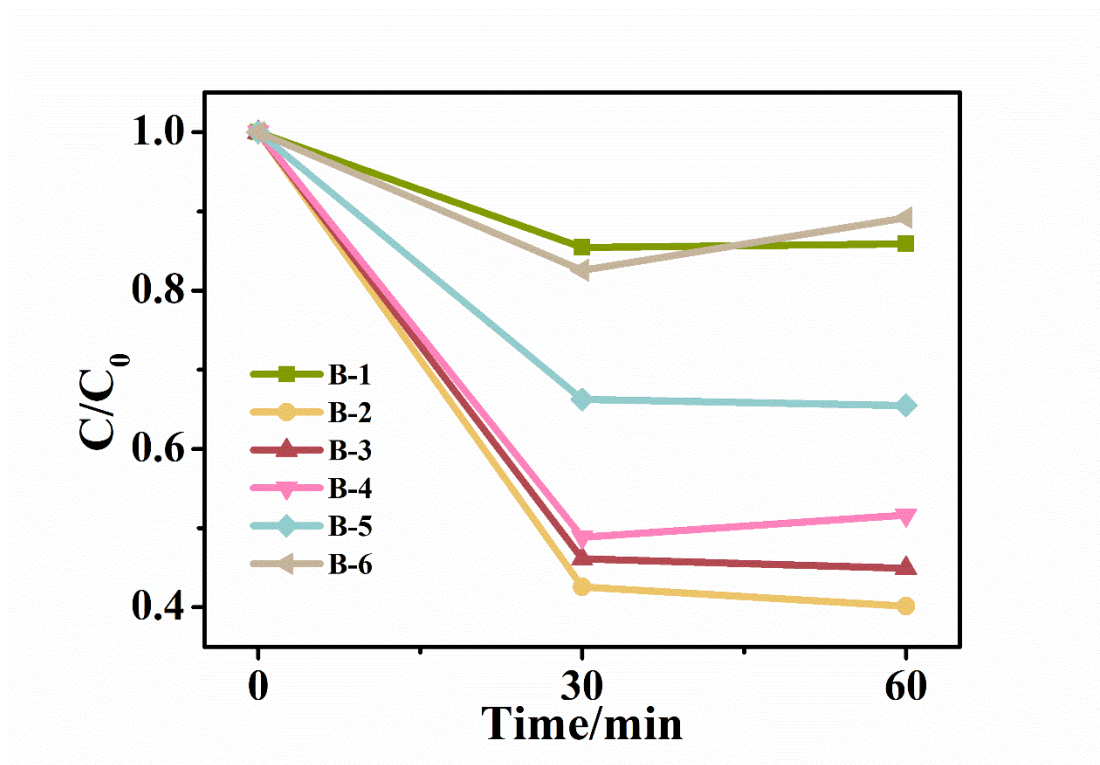

**Figure S5:** Adsorption-desorption equilibrium of different samples in the dark.

## References

- 1 Zhang X., Zhang L. Z., Xie T. F., Wang D. J. *J. Phys. Chem. C.* **2009**,113, 7371-8.
- 2 Jiang J., Zhang X., Sun P. B., Zhang L. Z. *J. Phys. Chem. C.* **2011**,115, 20555-64.
- 3 Yu Y. X., Ouyang W. X., Zhang W. D. *J. Solid State Electrochem.* **2014**,18, 1743-50.
- 4 Kuang P. Y., Ran J. R., Liu Z. Q., Wang H. J., Li N., Su Y. Z., et al. *Chem – Eur J.* **2015**, 21, 15360-8.
- 5 Tong Y. H., Zheng C., Lang W. J., Wu F., Wu T., Luo W. Q., et al. *Mater Des.* **2017**, 122, 90-101.
- 6 Jiang J. J., Wang H., Chen X. D., Li S., Xie T. F., Wang D. J., et al. *J. Colloid Intersurface Sci.* **2017**, 494, 130-8.
